# Supplementary material for: PLK1 inhibitors as a new targeted treatment for adrenocortical carcinoma
Source: PubMed Central journal article supplement (PMC10762563; doi:10.1530/ec-23-0403), 2023-12-14

Suppl. Figure 1

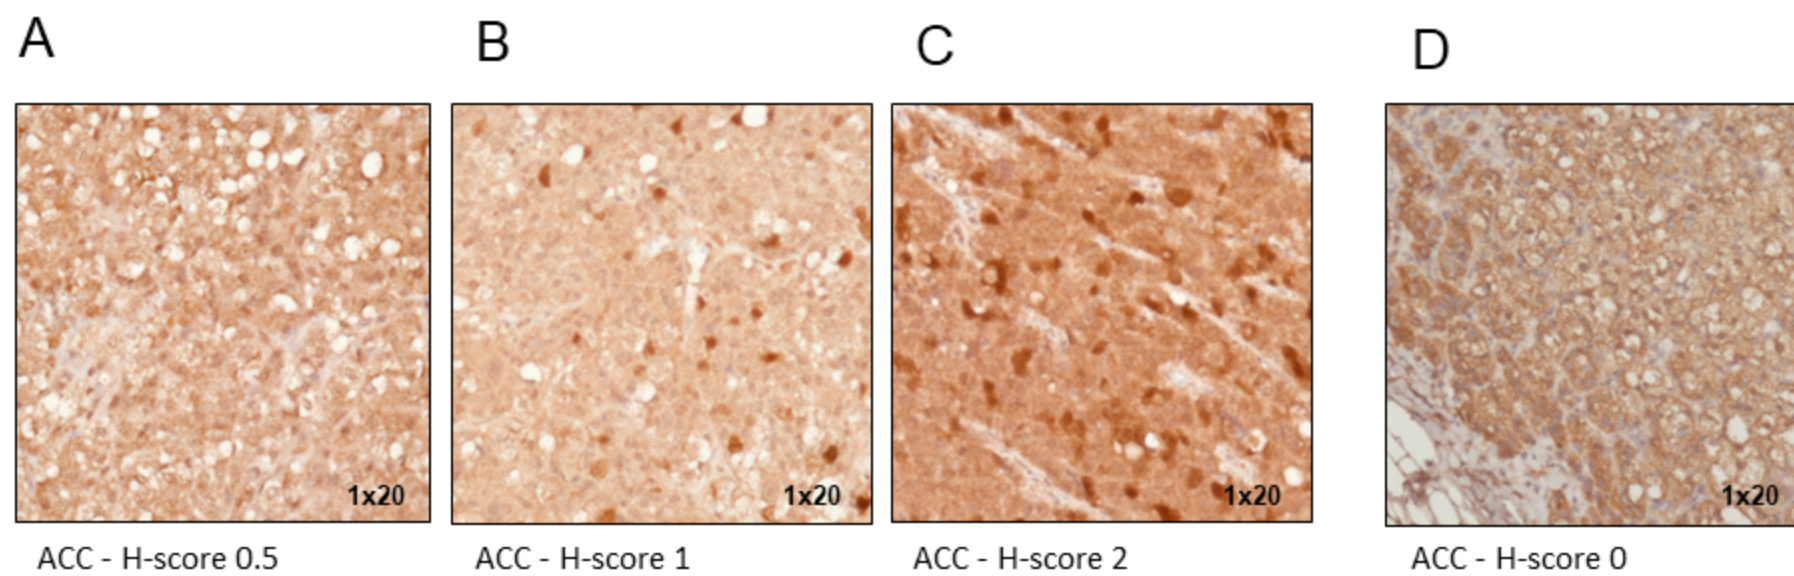

Supplement: supplementary_figure_1.pdf [file supplementary_figure_1.pdf]
