# Supplementary material for: PLK1 inhibitors as a new targeted treatment for adrenocortical carcinoma
Source: PubMed Central journal article supplement (PMC10762563; doi:10.1530/ec-23-0403), 2023-12-14
Supplement: supplementary_figure_2.pdf [file supplementary_figure_2.pdf]

Suppl. Figure 2

| ACC cell lines                                                                                                                                                                                                                 |                   | NCI-H295R             | MUC-1        | CU-ACC1        | CU-ACC2        |
|--------------------------------------------------------------------------------------------------------------------------------------------------------------------------------------------------------------------------------|-------------------|-----------------------|--------------|----------------|----------------|
| <b>Response to treatment in vitro</b>                                                                                                                                                                                          |                   |                       |              |                |                |
| Response to rigosertib                                                                                                                                                                                                         |                   | +++                   | +            | -              | +              |
| Response to poloxin                                                                                                                                                                                                            |                   | ++                    | +            | -              | ++             |
| <b>DNA alterations</b>                                                                                                                                                                                                         |                   |                       |              |                |                |
|                                                                                                                                                                                                                                | <b>Gene names</b> |                       |              |                |                |
|                                                                                                                                                                                                                                | <i>ATRX</i>       | Essential splice site | Nonsense     |                |                |
|                                                                                                                                                                                                                                | <i>CSFR1R</i>     | Missense              |              |                |                |
|                                                                                                                                                                                                                                | <i>CTNNB1</i>     | Missense              |              | Missense       |                |
|                                                                                                                                                                                                                                | <i>KDR</i>        | Frameshift            |              |                |                |
|                                                                                                                                                                                                                                | <i>MEN1</i>       |                       | Missense     |                |                |
|                                                                                                                                                                                                                                | <i>MSH2</i>       |                       |              |                | Deletion       |
|                                                                                                                                                                                                                                | <i>TP53</i>       | Deletion              | Frameshift   |                | Missense       |
| <p><b>Legend:</b> Red - nonsense mutation, blue - missense mutation, orange - frameshift/deletion, grey - essential splice site</p> <p style="text-align: center;"><b>Cell cycle related gene expression (fold-change)</b></p> |                   |                       |              |                |                |
| <b>Pathway/family</b>                                                                                                                                                                                                          | <b>Gene names</b> | <b>NCI-H295R</b>      | <b>MUC-1</b> | <b>CU-ACC1</b> | <b>CU-ACC2</b> |
| Aurora kinase                                                                                                                                                                                                                  | AURKA             | 5.74                  | 3.95         | 9.54           | 0.31           |
|                                                                                                                                                                                                                                | BIRC5             | 19.38                 | 21.16        | 10.28          | 7.35           |
| Cyclin dependent kinase                                                                                                                                                                                                        | CDC25A            | 10.98                 | 5.99         | 14.95          | 14.3           |
|                                                                                                                                                                                                                                | CDK1              | 179.94                | 81.08        | 217.27         | 99.46          |
|                                                                                                                                                                                                                                | CDK2              | 9.05                  | 5.26         | 5.49           | 7.16           |
|                                                                                                                                                                                                                                | CDK4              | 1.15                  | 0.37         | 1.78           | 2.23           |
|                                                                                                                                                                                                                                | CDK5              | 1.65                  | 0.49         | 2.72           | 0.66           |
|                                                                                                                                                                                                                                | CDK8              | 1.13                  | 0.64         | 7.72           | 0.62           |
|                                                                                                                                                                                                                                | CDK9              | 0.55                  | 1.12         | 2.53           | 0.31           |
| Ras family                                                                                                                                                                                                                     | HRAS              | 0.56                  | 0.36         | 1.91           | 0.48           |
|                                                                                                                                                                                                                                | KRAS              | 2.81                  | 1.22         | 2.03           | 2.43           |
|                                                                                                                                                                                                                                | NRAS              | 1.02                  | 0.45         | 1.16           | 2.24           |
| IGF system                                                                                                                                                                                                                     | IGF1R             | 0.14                  | 0.32         | 0.17           | 1.13           |
|                                                                                                                                                                                                                                | IGF2              | 20.15                 | 0.17         | 136.08         | 2.78           |
|                                                                                                                                                                                                                                | PIK3CA            | 0.47                  | 0.3          | 1.3            | 0.05           |
| PLK family                                                                                                                                                                                                                     | PLK1              | 4.68                  | 2.21         | 9.23           | 4.12           |
|                                                                                                                                                                                                                                | PLK2              | 5.15                  | 3.73         | 0.56           | 3.04           |
|                                                                                                                                                                                                                                | PLK4              | 11.75                 | 18.02        | 14.52          | 14.51          |
|                                                                                                                                                                                                                                | TERT              | 0.33                  | 0.62         | 2.02           | 0.46           |
| Topoisomerase                                                                                                                                                                                                                  | TOP2A             | 133.1                 | 68.58        | 144.17         | 122.59         |
